# Supplementary material
Source: PubMed Central journal article supplement (PMC5801356)
Supplement: ajtr0010-0175-f7.pdf [file ajtr0010-0175-f7.pdf]

## Conversion of human fibroblasts into Leydig-like cells

**Table S1.** Primers for polymerase chain reaction

| Gene    | Sense primer                             | Antisense primer                 |
|---------|------------------------------------------|----------------------------------|
| SF1     | CCGGAATTCGCCACCATGGACTATTCGTACGACGAGGACC | CCGCTCGAGTCAAGTCTGCTTGGCTTGACGC  |
| GATA4   | CCGGAATTCGCCACCATGTATCAGAGCTTGGCCATGGC   | CCGCTCGAGTTACGCAGTGATTATGTCCCCGT |
| NGFI-B  | CCGGAATTCGCCACCATGCCCTGTATCCAAGCCCA      | CCGCTCGAGTCAGAAGGGCAGCGTGTCC     |
| COUPTF2 | CCGGAATTCGCCACCATGGCAATGGTAGTCAGCACG     | CCGCTCGAGTTATTGAATTGCCATATACGGCC |

**Table S2.** Primers for quantitative reverse transcription-polymerase chain reaction

| Gene      | Sense primer            | Antisense primer       |
|-----------|-------------------------|------------------------|
| StAR      | GGGGACAAAGTGATGAGTAAAG  | GCTCGTGAGTAATGAATGTATC |
| HSD3B1    | AACTCTTTGCTCAGGGTGTAAAT | CTGTCAAGTGTGGAAAGTTCTC |
| HSD17B3   | AATGGCTTGGGAGAAGGTTTG   | AGCGGACTACAGGGAGGAGTGT |
| CYP11A1   | TTCAGGCATCAGAATGAGGTT   | GGCTGAGCAAAGACAAGAACA  |
| CYP17A1   | ATTGGTTACCGCCACGAAGAC   | CAACAACCGTAAGGGTATCGC  |
| Vimentin  | TGAATGACCGCTTCGCCAACTA  | GGTGTTCGGCTTCTCTCTC    |
| Ecadherin | ACAATGCCGCCATCGCTTAC    | AACTCTCTCGGTCCAGCCCA   |
| SF-1      | CTCACCCACCTTCCAAACAC    | CAACCTGCTCATCGAAATGCT  |
| GATA4     | GCCTCTTCTTTGCTATCCTC    | CGTTCTCAGTCAGTGCGATGT  |
| NGFI-B    | GGACTGAAGGAAAAGAAGGCT   | CAGTGGCTCTGACTACTATGGC |
| COUPTF2   | TACCTACCAAACGGACGAAAA   | GTTGACTCAGCCGAGTACAGC  |
| GAPDH     | ACAACCTTGGTATCGTGGAAGG  | GCCATCACGCCACAGTTTC    |

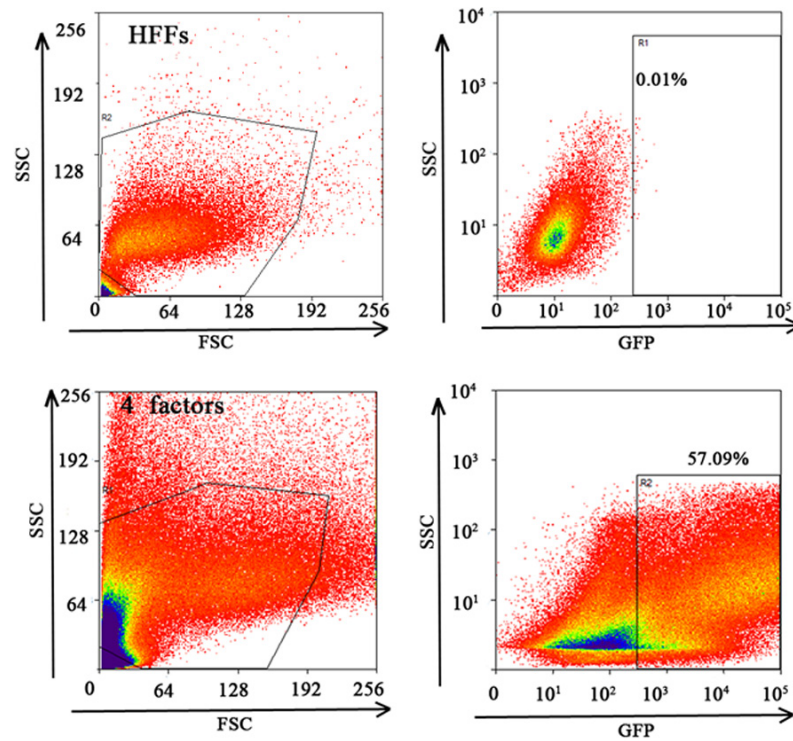

**Figure S1.** Representative flow cytometry plot for analyses of green fluorescence protein, GFP+ cells 1 week after infection of HFFs with lentiviruses expressing 4 factors, Cells infected with empty vector lentivirus were used as a control. The numbers in each plot indicate the percentage of GFP+ cells.

## Conversion of human fibroblasts into Leydig-like cells

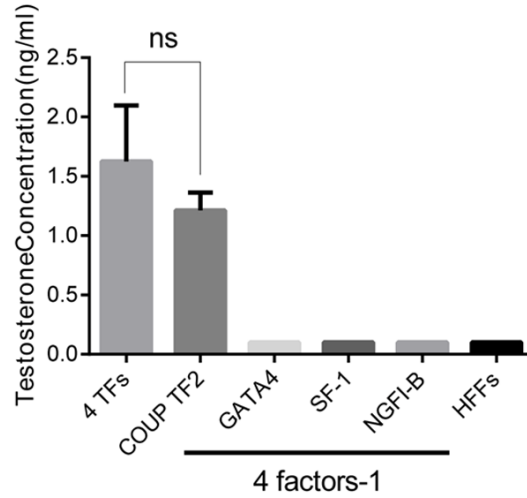

**Figure S2.** Testosterone production in iLCs transduced with different combinations of factors 1 week after transfection. ns, not significant.

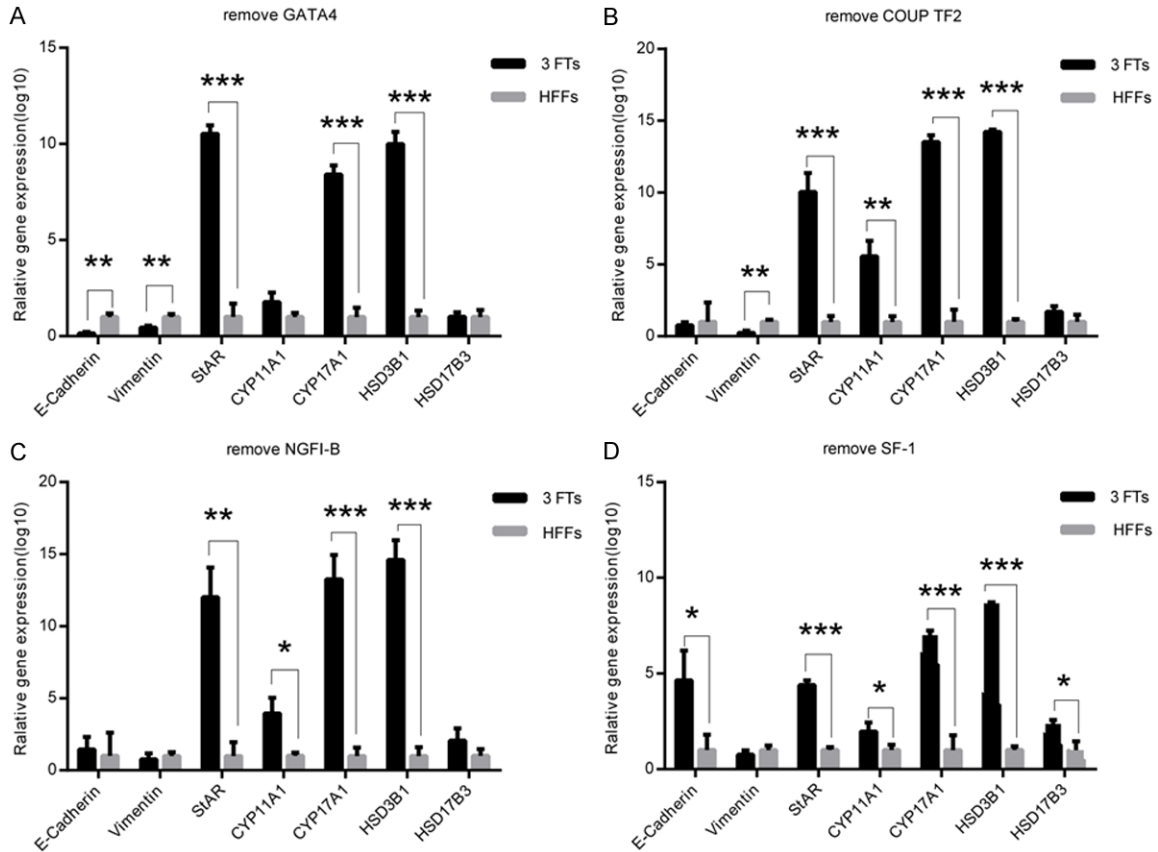

**Figure S3.** Quantitative RT-PCR analysis of the expression of related genes in iLCs transduced with different combinations of factors 1 week after transfection. Data represent mean  $\pm$  SD of triplicate experiments. \* $P < 0.05$ , \*\* $P < 0.01$ , \*\*\* $P < 0.001$ . A: *GATA4* removed from the 4F pool. B: *COUP TF2* removed from the 4F pool. C: *NGFI-B* removed from the 4F pool. D: *SF-1* removed from the 4F pool.

Conversion of human fibroblasts into Leydig-like cells

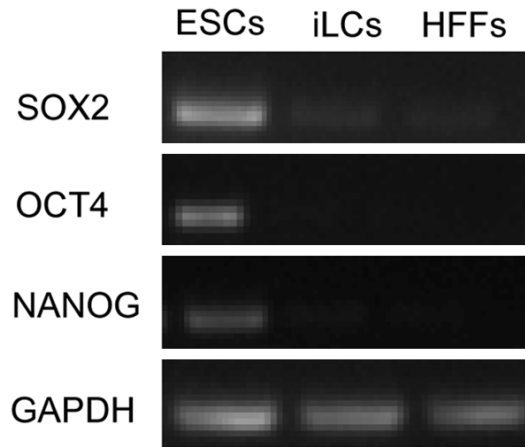

**Figure S4.** RT-PCR analysis of an ESC-specific marker at day 3 after infection. Primers (5' to 3'): OCT4 forward, CTGGGTTGATCCTCG-GACCT, reverse, CACAGAACTCATACGGCGGG; SOX2 forward, AGTGAAA-CTTTTGTGGAGAC, reverse, GCAGCGTGTACTTATCCTTCTT; NANOG forward, AAAGAATCTCACCTATGCC, reverse, GAAGGAAGAGGAGAGACAGT.

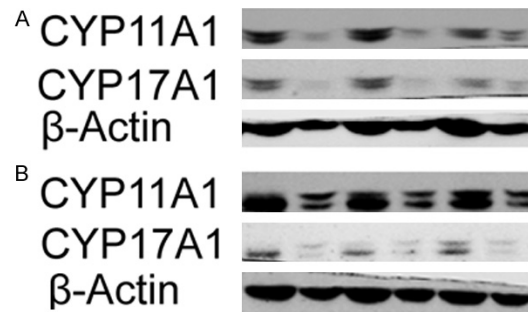

**Figure S5.** Original western images for protein expression of CYP11A1 and CYP17A1 in iLCs at 3 (A) and 4 weeks (B) after infection.
